# Supplementary material
Source: PubMed Central journal article supplement (PMC5440013)

SUPPLEMENTARY DATA

**Supplementary Table 1. Human iPSCs**

|                |                                                                     |            |                         |                           |
|----------------|---------------------------------------------------------------------|------------|-------------------------|---------------------------|
| <b>hiPSC#1</b> | Commercial foreskin fibroblasts (CRL-2522, ATCC, Manassas, VA, USA) | Newborn, M | Lentiviral transduction | OCT4, SOX2, cMYC and KLF4 |
| <b>hiPSC#2</b> | Dermal fibroblasts                                                  | 45y, M     | Retroviral transduction | OCT4, SOX2, cMYC and KLF4 |
| <b>hiPSC#3</b> | Commercial dermal fibroblasts (C-013-5C, Life Technologies)         | Adult, F   | Episomal transduction   | OCT4, SOX2, cMYC and KLF4 |

hiPSCs submitted to mechanical passage were seeded on Matrigel (Corning), and cultured in mTESR1 (StemCell Technologies).

SUPPLEMENTARY DATA

Supplementary Table 2. Antibodies

| Antibody                | Reference                       | Species    | IF    | FACS                     | WB      | IHC    |
|-------------------------|---------------------------------|------------|-------|--------------------------|---------|--------|
| Anti-human cytoplasm    | StemCells Incorporation STEM121 | Mouse      |       |                          |         | 1/1000 |
| anti-human mitochondria | MAB1273 – Millipore             | Mouse      |       |                          |         | 1/100  |
| AKT                     | Santa Cruz H136                 | Rabbit     |       |                          | 1/500   |        |
| C/EBP $\alpha$          | Santa Cruz 14A4                 | Rabbit     | 1/100 |                          | 1/250   |        |
| Caveolin1               | BD Biosciences 610059           | Rabbit     |       |                          | 1/1000  |        |
| CD166                   | BD Biosciences PE 55559263      | Mouse      |       | 8 $\mu$ L / 100000 cells |         |        |
| CD29                    | BD Biosciences APC 561858       | Mouse      | 1/50  |                          |         |        |
| CD29                    | BD Biosciences PE 555443        | Mouse      | 1/50  | 8 $\mu$ L / 100000 cells |         |        |
| CD44                    | BD Biosciences APC 561858       | Mouse      | 1/50  |                          |         |        |
| CD44                    | BD Biosciences PE 550989        | Mouse      | 1/50  | 8 $\mu$ L / 100000 cells |         |        |
| CD73                    | BD Biosciences PE 550257        | Mouse      |       | 8 $\mu$ L / 100000 cells |         |        |
| Cited1                  | Cell signaling 5H6              | Mouse      | 1/200 |                          |         | 1/100  |
| DIO2                    | Novus biological NBP1-00178     | Goat       |       |                          |         | 1/500  |
| GLUT4                   | Santa Cruz H61                  | Rabbit     | 1/100 |                          | 1/2500  |        |
| Ir $\beta$              | Santa Cruz 29B4                 | Mouse      |       |                          | 1/600   |        |
| Ki67                    | AbCam Ab 15580                  | Rabbit     | 1/200 |                          |         |        |
| Nanog                   | Cell Signaling D73G4            | Rabbit     | 1/200 |                          |         |        |
| Oct 3/4                 | 3576 – Biovision                | Rabbit     | 1/200 |                          |         |        |
| P-AKT                   | Santa Cruz Ser473               | Rabbit     |       |                          | 1/500   |        |
| P-PY                    | Santa Cruz PY99                 | Mouse      |       |                          | 1/2000  |        |
| PDGFR $\alpha$          | Cell signaling D1E1E            | Rabbit     | 1/200 |                          |         |        |
| Perilipin1              | Progen GP29                     | Guinea Pig |       |                          | 1/500   | 1/500  |
| PPAR $\gamma$           | Santa Cruz 7273                 | Mouse      |       |                          | 1/800   |        |
| PRDM16                  | Abcam 106410                    | Rabbit     | 1/200 |                          | 1/1000  | 1/400  |
| Sox2                    | AB5603 – Millipore              | Rabbit     | 1/200 |                          |         |        |
| SSEA-3/4                | MAB1435 – Millipore             | Mouse      | 1/100 |                          |         |        |
| T Box                   | R&D systems                     | Goat       | 1/100 |                          |         |        |
| Tra-1-60                | MAB4360 – Millipore             | Mouse      | 1/100 |                          |         |        |
| Tra-1-81                | MAB4381 – Millipore             | Mouse      | 1/100 |                          |         |        |
| UCP1                    | Abcam 10983                     | Rabbit     | 1/400 |                          |         |        |
| UCP1                    | Abcam 23841                     | Rabbit     |       |                          | 1/1000  | 1/150  |
| $\beta$ Actin           | Sigma A5441                     | Mouse      |       |                          | 1/10000 |        |

FACS: fluorescence-activated cell sorting (for characterization of hiPSC-derived MSCs at passage 6)

For **immunofluorescence microscopy (IF)**, cells were fixed in 3.2% PFA for 15 min at room temperature. Blocking used PBS-BSA 3% 0.1 % Triton X100 or saponin. Primary antibodies were diluted in PBS, 0.01 % Triton X100 or saponin, 3% BSA. Secondary antibodies coupled to Alexa 488 were diluted to 1/1000 in PBS, 0.01% triton X100 or saponin, 3% BSA. Adipocytes were incubated for 15 min in 25 ng/mL Nile Red (#N-1142, Life Technologies) or Bodipy<sup>493/503</sup> (#D3922, Life Technologies). Cells were incubated for 5 min in DRAQ5 (#4084, Cell Signaling Technology) before mounting (Fluoromount-G, Southern Biotech). Cells preparations were observed with a confocal microscope (Leica SP2).

For **Western Blot (WB)**, samples were lysed in 50 mM Tris, pH 7.4, 270 mM sucrose, 1 mM Na-orthovanadate, pH 10, 1 mM EDTA, 1 mM EGTA, 10 mM Na- $\beta$ -glycerophosphate, 50 mM NaF, 5 mM Na-pyrophosphate, 1% (w/v) Triton X-100, 0.1% (v/v) 2 $\beta$ -mercaptoethanol, and Complete protease inhibitors (Roche), centrifuged (15,000g, 4°C for 10 min) and stored at -20°C. Protein concentrations were determined by Biorad protein assay kit. Samples were subjected to SDS/PAGE, blotted and protein signals were visualized using enhanced chemiluminescence (Amersham ECL Prime WB detection kit, GE Healthcare).

**Immunohistochemistry (IHC)** of fat pads excised and fixed in 4% PFA was performed as previously described (Bérézziat V et al, Am J Pathol 2011;179:2443-2453).

SUPPLEMENTARY DATA

**Supplementary Table 3. Primer sequences used for RT-quantitative PCR**

|                |                         |                           |
|----------------|-------------------------|---------------------------|
| CAR4           | tgtcAAAataacgggcact     | cagtctctccagaatgc         |
| C/EBP $\alpha$ | gacatcagcgcctacatcg     | ggctgtgctggaacaggt        |
| C/EBP $\beta$  | ccagcccctcactaatagc     | ccctgctctgagctgtcg        |
| C/EBP $\delta$ | ggacataggagcgcaaagaa    | ggacataggagcgcaaagaa      |
| CD137          | agctgttacaacatagtagccac | tctctcaatgatcttgcctct     |
| CD24           | tgaagaacatgtgagaggttgac | gaaaactgaatctccattccaaa   |
| CD29           | cgatgccatcatgcaagt      | acaccagcagccgtgtaac       |
| CD44           | tgccgcttgcagggtgat      | ggcctccgtccgagaga         |
| CITED1         | accggacttgagtcagaga     | cagttccgccactgaaaac       |
| GAPDH          | agccacatcgcctcagacac    | gccaatcagaccaaacc         |
| DIO2           | cctcctcgatgcctacaaac    | gctggcaaaagtaagaaggt      |
| EPST1          | aggcaaaagtaaccagggtg    | tgaaggccagataggagctcaa    |
| HOXC9          | gcagcaagcacaagagga      | cgtctggtacttgggtagg       |
| KCNK3          | ccttacttcgccateacc      | gaacatgcagaacaccttgc      |
| MYF5           | ctatagcctgccgggaca      | tggaccagacaggactgttacct   |
| MTUS1          | atctcaaggcagcttccacg    | tcgctgttgacttccgactc      |
| NANOG          | atgctcacacgggagactgt    | cagggtgtctgtaataagc       |
| OCT3/4         | gctcaagaacatgtgtaagctg  | agggttccgcttggcat         |
| PAX7           | gaaaaccaggcatgttcag     | gcggctaatacgaactactaa     |
| PDGFR $\alpha$ | ccacctgagtgagattgtgg    | tctcaggaagtcagggtgaa      |
| PGC1 $\alpha$  | tgagaggccaagcaaaag      | ataaatcacacggcgctctt      |
| PPAR $\alpha$  | gcactggaactggatgacag    | ttagaaggccaggacgatct      |
| PPAR $\gamma$  | cagtggggatgtctcataa     | ctttggcactactctgtgat      |
| PRDM16         | tggctgctctggactca       | atattattacaacgtcaccgtcact |
| Sca-1/LY6E     | gccatcctctccagaatgaa    | gcaggagaagcacatcagc       |
| SOX2           | gggggaatggacctgtatag    | gcaagctcctaccgtacca       |
| T BOX          | gctgtgacaggtacccaacc    | catgcaggtgagttgcagaa      |
| TMEM26         | ttgacatgagaccaggt       | tgtgtgtatctgtgatgtcc      |
| UCP1           | ctcaccgagggaagaa        | ggttgccaatgaaactgc        |

Total RNAs were extracted with NucleoSpin RNA (Macherey-Nagel) according to the manufacturer instructions. cDNA was synthesized from 1  $\mu$ g RNA (High capacity cDNA reverse transcription kit, Life Technologies). Quantitative PCR was performed with LightCycler 480 using LightCycler 480 SYBR Green I Master mix (Roche Diagnostics). GAPDH mRNA was used for normalization.

SUPPLEMENTARY DATA

**Supplementary Figure 1. Characterization of pluripotency and mesodermal differentiation of hiPSC**

Characterization of hiPSC at D0 for (A) normal karyotype, (B) *NANOG*, *SOX2* and *OCT3/4*, mRNA gene expression compared to that of human embryonic stem cells (ESC) (mean ± SEM arbitrary units (A.U.) relative to D0; n ≥ 3 independent experiments; \*p<0.05 relative to D0, Mann-Whitney U-test). (C) Immunostaining of *NANOG*, *OCT4*, *SOX2* (red), *TRA-1-60*, *TRA-1-81* and *SSEA3/4* (green). Nuclei were stained with *DRAQ5* (blue). Bars: 100 μm. (n≥3). (D) Positive alkaline phosphatase staining (using SIGMAFAST BCPI/NBT (Sigma-Aldrich) after fixation in 95% ethanol), and (E) Score Cards analysis (TaqMan® hPSC Scorecard™ Panel, Life Technologies) assessing pluripotency and trilineage differentiation potential of hiPSCs. Time-course mRNA expression analysis of the pluripotency markers *NANOG*, *SOX2* and *OCT3/4* (F) and the mesodermal transcription factor *T-brachyury* (*TBOX*) (G) (mean ± SEM A.U. relative to D0; n ≥ 3 independent experiments; \*p<0.05 relative to D0, Mann-Whitney U-test).

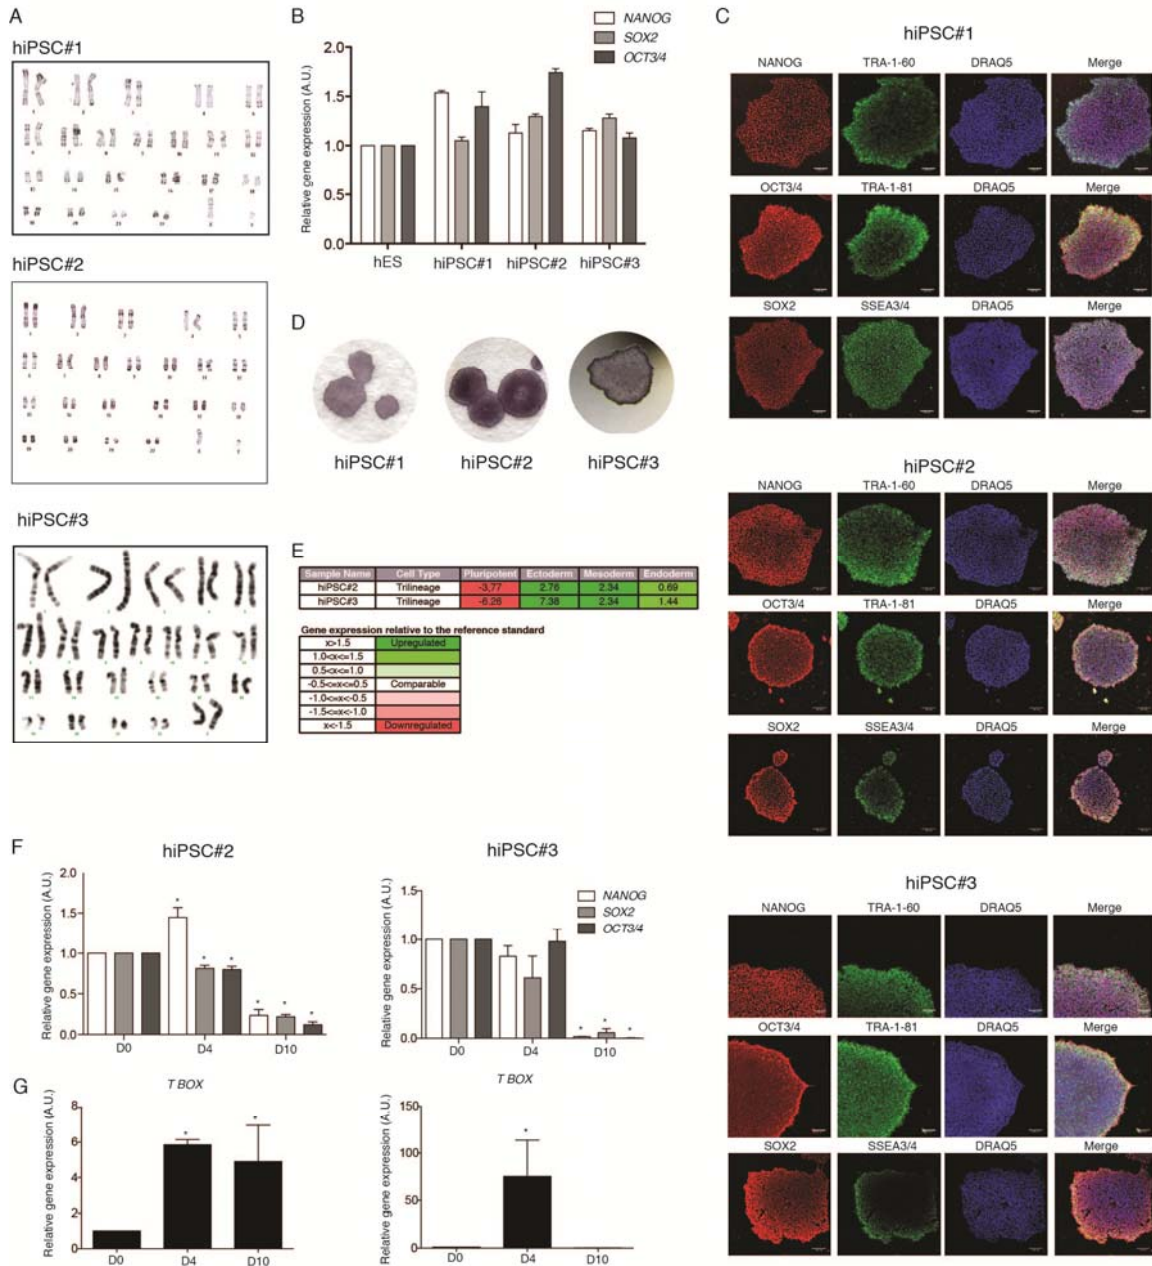

SUPPLEMENTARY DATA

**Supplementary Figure 2. Time course mRNA expression of hiPSC#2 and #3**

(A) hiPSC#2 and hiPSC#3-derived adipocytes were characterized at D4 and after adipogenic induction (D10, D20). Time-course mRNA expression analysis of (A) *PDGFRA*, *LY6E*, *CD24*, *CD44*, *CD29* and (B) *C/EBPB*, *C/EBPD*, *C/EBPA* and *PPARG*. (C) brown/beige adipocyte markers *UCP1*, *PGC1A* and *PRDM16*, and (D) beige adipocyte specific genes *CITED1*, *TMEM26*, *CD137*, *HOXC9*, *EPST11*, *CAR4*, *KCNK3* and *MTUS1* (mean  $\pm$  SEM A.U. relative to D4;  $n \geq 3$  independent experiments; \* $p < 0.05$  relative to D4, Mann-Whitney U-test).

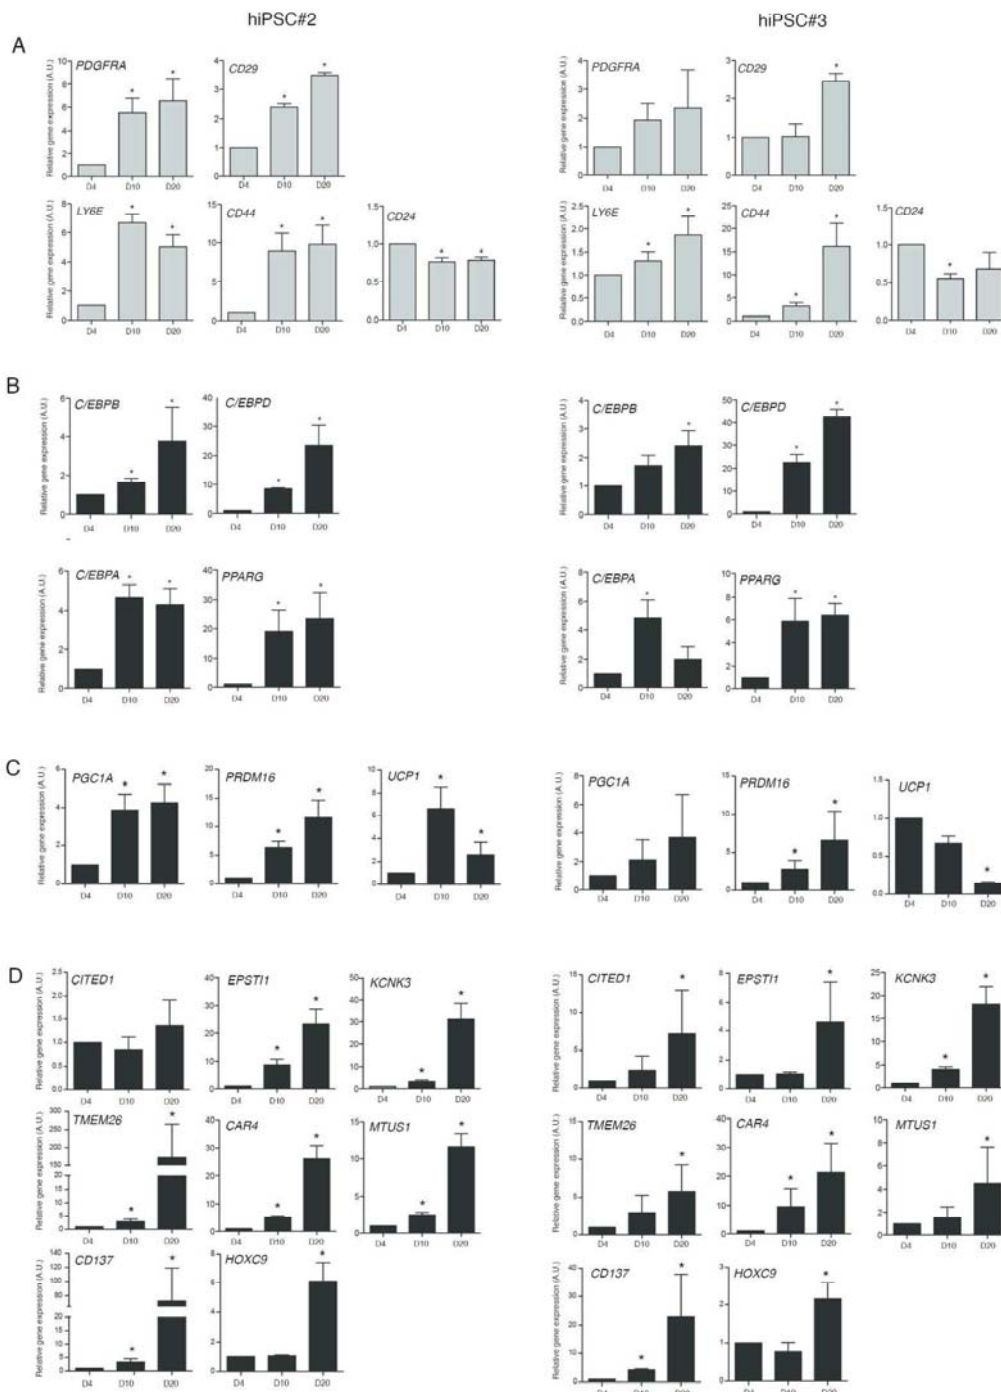

SUPPLEMENTARY DATA

**Supplementary Figure 3. Global transcription analysis of the hiPSC-derived population during differentiation**

(A) Unsupervised data analysis by principal component analysis (PCA) showing different patterns at each differentiation step. RNA concentration and integrity were evaluated with the Agilent Bioanalyzer 2100, and data were RMA (Robust Multi-array Average) normalized with Bioconductor. We used one-way ANOVA for time factor to extract DEGs with PartekGS©. N=3 independent experiments. (B) Heatmap and hierarchical clustering of the whole gene set at five successive stages of hiPSC-derived time course differentiation ( $p < 0.01$  over time). (C, D, E) Detailed heatmaps showing transcriptomic signatures of published datasets used for Gene Set Enrichment Analysis in Fig. 1. Gene Set Enrichment Analysis ([www.broadinstitute.org/GSEA](http://www.broadinstitute.org/GSEA)) used parameters of 1,000 gene set permutation, gene set size between 20 and 500 and weighted set. An enrichment map was generated using enriched gene set with  $p < 0.001$ ,  $FDR < 1$  and  $NES > 5$ .

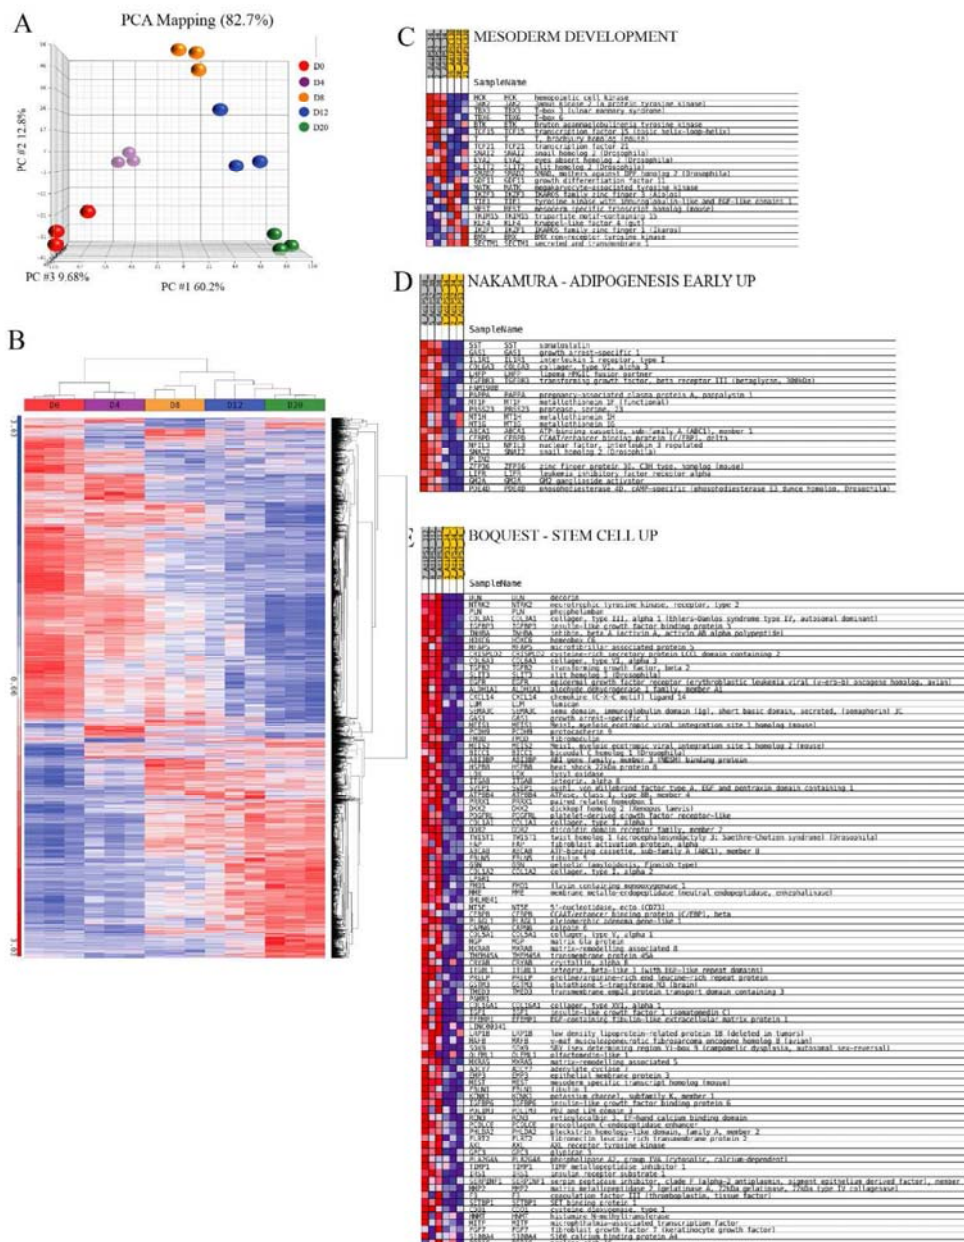

Supplement: DB161107SupplementaryData.pdf [file DB161107SupplementaryData.pdf]
